# Supplementary material for: Fine particle chemistry under a special dust transport event: impacts from unusually enhanced ozone and air mass backflows over the ocean
Source: Copernicus journal article supplement (doi:10.5194/egusphere-2023-127), 2023-03-10
Supplement: Supplementary file 1 [file egusphere-2023-127-supplement.pdf]

## *Supplementary Information*

### **Fine particle chemistry under a special dust transport event: impacts from unusually enhanced ozone and air mass backflows over the ocean**

Da Lu<sup>1</sup>, Hao Li<sup>1</sup>, Guochen Wang<sup>1</sup>, Xiaofei Qin<sup>1</sup>, Na Zhao<sup>1</sup>, Juntao Huo<sup>2</sup>, Fan Yang<sup>3</sup>,  
Yanfen Lin<sup>2</sup>, Jia Chen<sup>2</sup>, Qingyan Fu<sup>2</sup>, Yusen Duan<sup>2</sup>, Xinyi Dong<sup>4</sup>, Congrui Deng<sup>1</sup>,  
Sabur F. Abdullaev<sup>5</sup>, Kan Huang<sup>1,6\*</sup>

<sup>1</sup>Center for Atmospheric Chemistry Study, Shanghai Key Laboratory of Atmospheric Particle Pollution and Prevention (LAP<sup>3</sup>), National Observations and Research Station for Wetland Ecosystems of the Yangtze Estuary, Department of Environmental Science and Engineering, Fudan University, Shanghai, 200433, China

<sup>2</sup>State Ecologic Environmental Scientific Observation and Research Station for Dianshan Lake, Shanghai Environmental Monitoring Center, Shanghai, 200030, China

<sup>3</sup>Pudong New District Environmental Monitoring Station, Shanghai 200122, China

<sup>4</sup>School of Atmospheric Sciences, Nanjing University, Nanjing 210023, China

<sup>5</sup>Physical Technical Institute of the Academy of Sciences of Tajikistan, Dushanbe, Tajikistan

<sup>6</sup>Institute of Eco-Chongming (IEC), Shanghai, 202162, China

Corresponding author: [huangkan@fudan.edu.cn](mailto:huangkan@fudan.edu.cn)

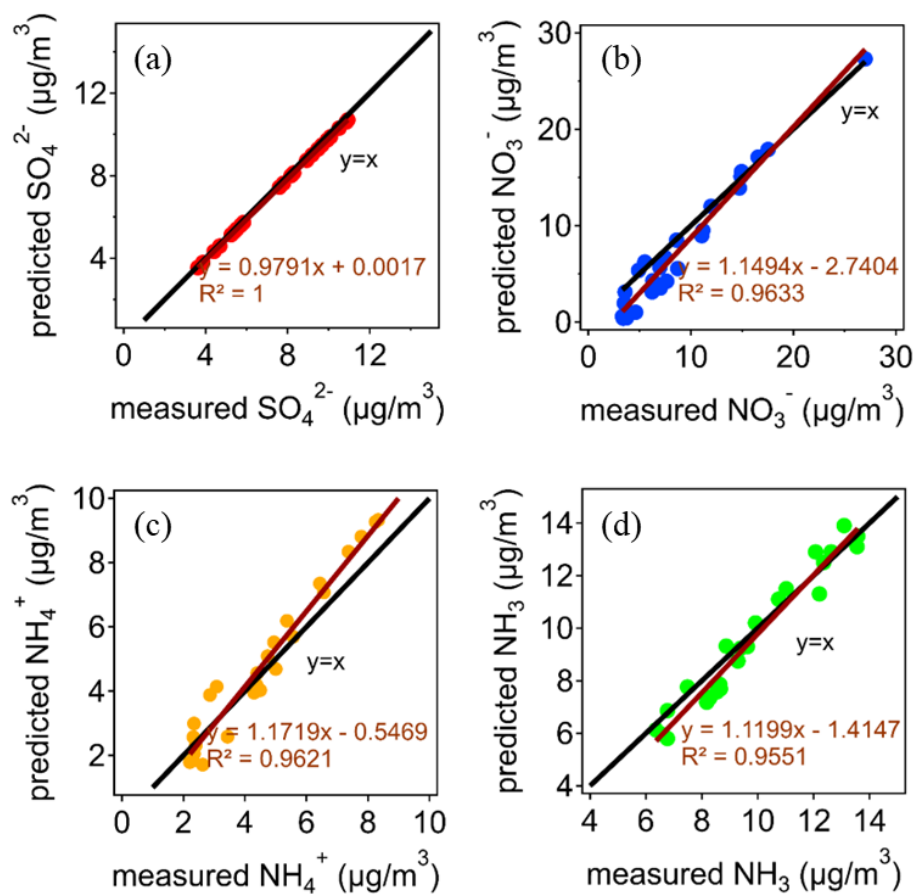

Figure S1. Correlations between the ISORROPIA - II predicted and measured species of (a)  $\text{SO}_4^{2-}$ , (b)  $\text{NO}_3^-$ , (c)  $\text{NH}_4^+$ , and (d)  $\text{NH}_3$  for the  $\text{SO}_4^{2-}$ - $\text{NO}_3^-$ - $\text{NH}_4^+$ - $\text{Cl}^-$ - $\text{NH}_3$ - $\text{HCl}$ - $\text{HNO}_3$  system during P3

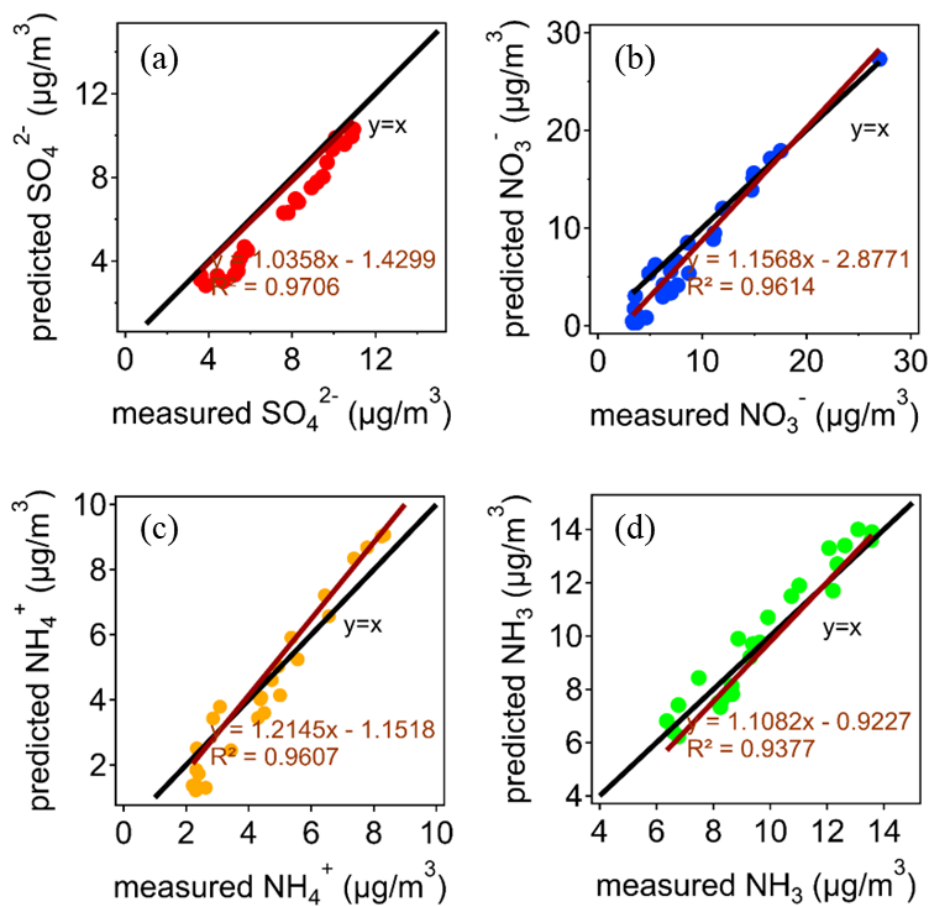

Figure S2. Correlations between the ISORROPIA-II predicted and measured species of (a)  $\text{SO}_4^{2-}$ , (b)  $\text{NO}_3^-$ , (c)  $\text{NH}_4^+$ , and (d)  $\text{NH}_3$  for the  $\text{SO}_4^{2-}$ - $\text{NO}_3^-$ - $\text{NH}_4^+$ - $\text{Cl}^-$ - $\text{Ca}^{2+}$ - $\text{NH}_3$ - $\text{HCl}$ - $\text{HNO}_3$  system during P3

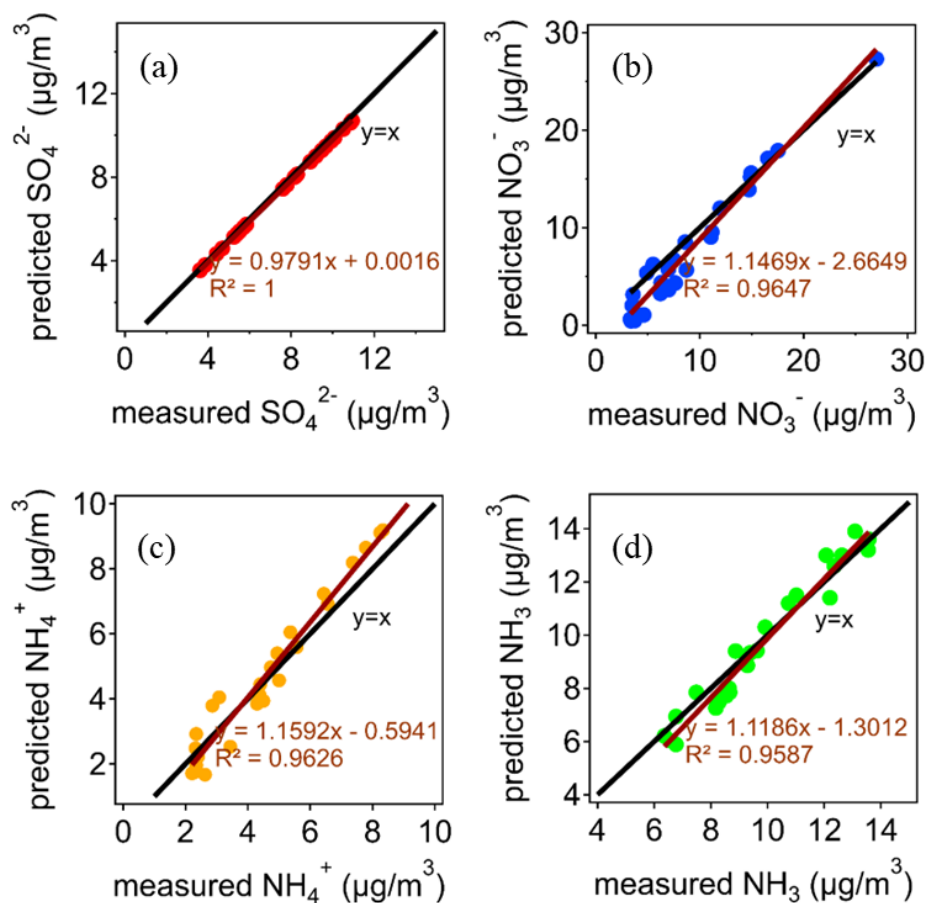

Figure S3. Correlations between the ISORROPIA-II predicted and measured species of (a)  $\text{SO}_4^{2-}$ , (b)  $\text{NO}_3^-$ , (c)  $\text{NH}_4^+$ , and (d)  $\text{NH}_3$  for the  $\text{SO}_4^{2-}$ - $\text{NO}_3^-$ - $\text{NH}_4^+$ - $\text{Cl}^-$ - $\text{Na}^+$ - $\text{NH}_3$ - $\text{HCl}$ - $\text{HNO}_3$  system during P3

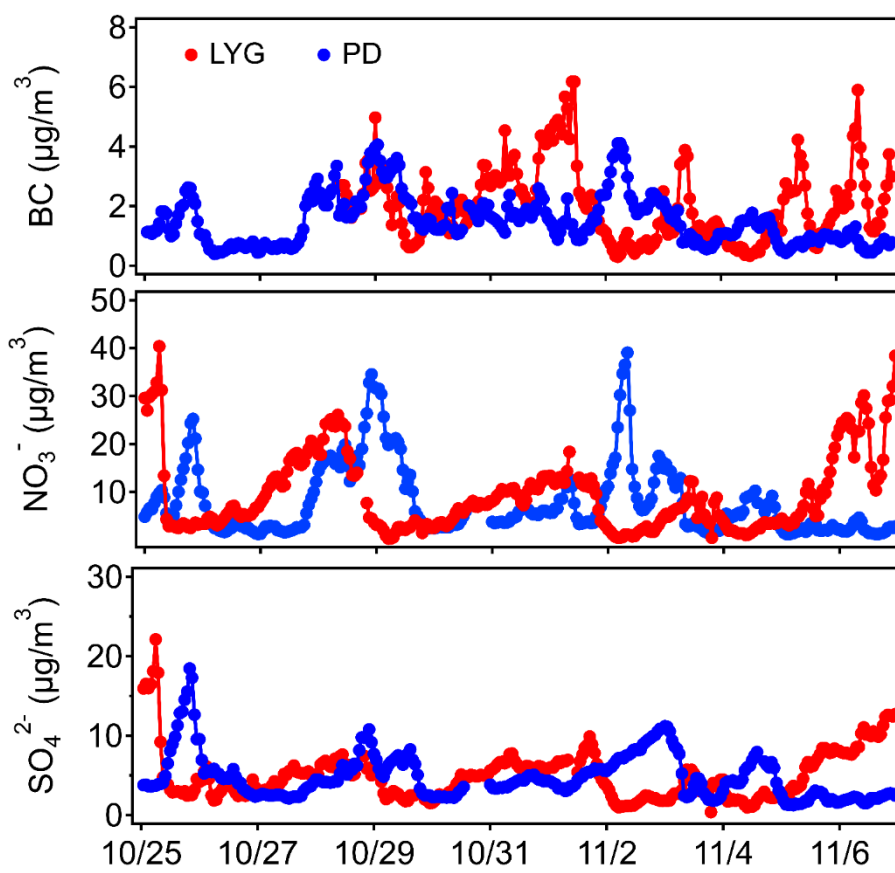

Figure S4. Time-series of BC, nitrate, and sulfate measured at LYG and PD during the study period.
